# Supplementary material for: Diuretic Activity of Compatible Triterpene Components of Alismatis rhizoma
Source: Molecules. 2017 Sep 6;22(9):1459. doi: 10.3390/molecules22091459 (PMC6151603; doi:10.3390/molecules22091459)
Supplement: Supplementary file 1 [file molecules-22-01459-s001.pdf]

**Table S1 Analysis results of each method**

| factors  | Quadratic polynomial<br>stepwise regression | Stepwise regression item<br>factors and interactions | Many factor and squared<br>regression step by step | Stepwise<br>regression |
|----------|---------------------------------------------|------------------------------------------------------|----------------------------------------------------|------------------------|
| <i>p</i> | 0.0112                                      | 0.0040                                               | 0.0364                                             | 0.2998                 |
| <i>r</i> | 0.9999                                      | 0.9999                                               | 0.9998                                             | 0.9312                 |
| <i>d</i> | 1.8234                                      | 1.7351                                               | 1.0412                                             | 1.8205                 |

*p*<0.05 indicating a significant difference;

The closer the absolute value of *r* is closer to 1, the higher the degree of correlation between variables;

*d* statistics shows that residual is around 2 to obey normal distribution.
